# Supplementary material for: Applying generalized additive models to unravel dynamic changes in anthocyanin biosynthesis in methyl jasmonate elicited grapevine (Vitis vinifera cv. Gamay) cell cultures
Source: PubMed Central journal article supplement (PMC5527128; doi:10.1038/hortres.2017.38), 2017-07-26

**Applying Generalized Additive Models to Unravel Dynamical Changes in Anthocyanin  
Biosynthesis in Methyl Jasmonate Elicited Grapevine  
(*Vitis vinifera* cv. Gamay) Cell Cultures**

Running Title: Modeling secondary metabolism in cell cultures

Nay Min Min Thaw Saw, Claudio Moser, Stefan Martens, Pietro Franceschi\*

*Research and Innovation Centre, Fondazione Edmund Mach (FEM), Via E. Mach 1,  
38010 San Michele all'Adige, Italy.*

\* Correspondence to

Pietro Franceschi: [pietro.franceschi@fmach.it](mailto:pietro.franceschi@fmach.it)

Tel: +39-0461-615556

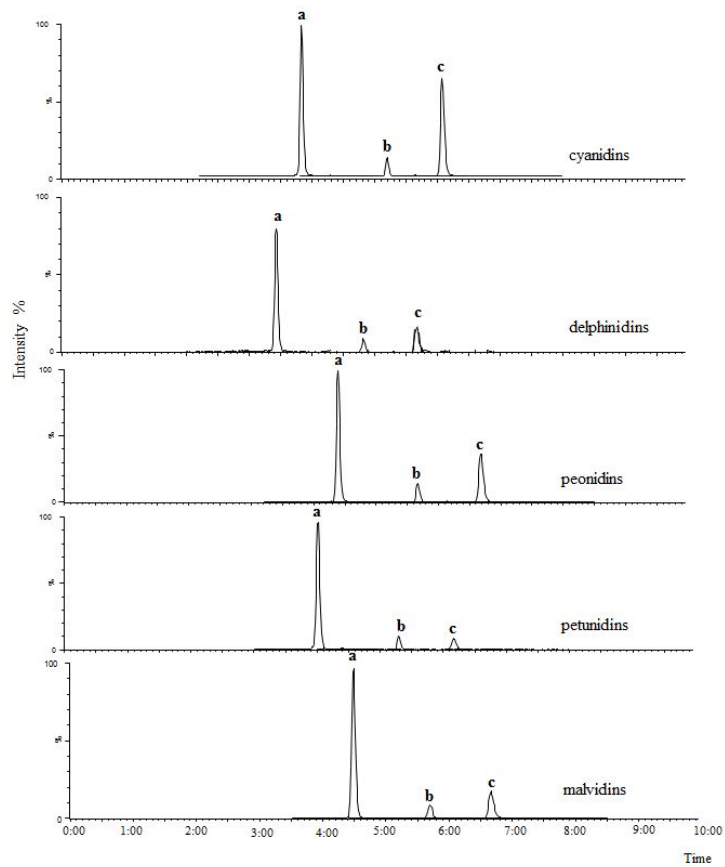

Figure S1: Fig 1. UPLC/QqQ-MS/MS chromatograms of anthocyanins; monoglucosides (a), acetyl glucosides (b) and coumaryl glucosides (c) obtained from grape cells extract.

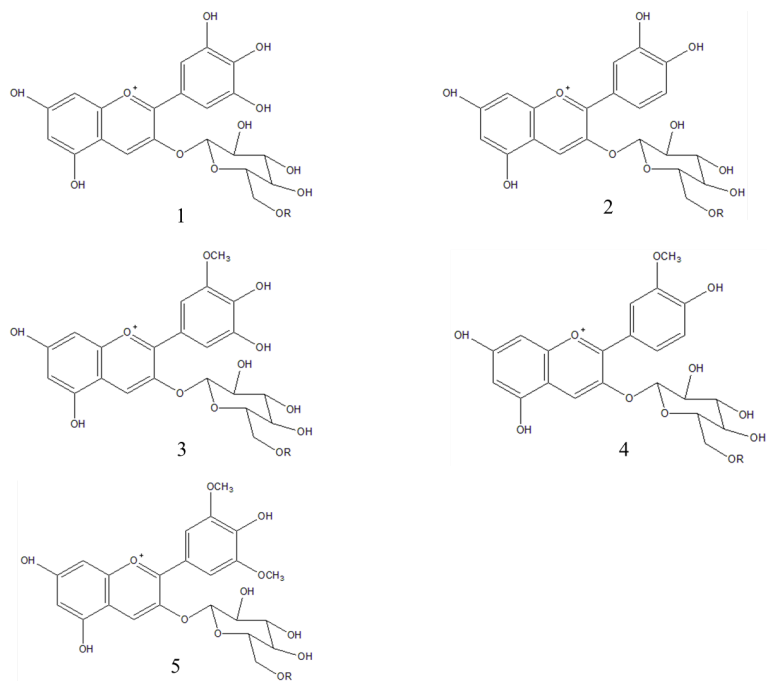

Figure S2: Fig 2. Principal anthocyanins in *V. vinifera* (L.) cv. Gamay cell suspension cultures. R: H, acetyl, *p*-coumaroyl; (1) delphinidin-3-O-glucoside, (2) cyanidin-3-O-glucoside, (3) petunidin-3-O-glucoside, (4) peonidin-3-O-glucoside, (5) malvidin-3-O-glucoside

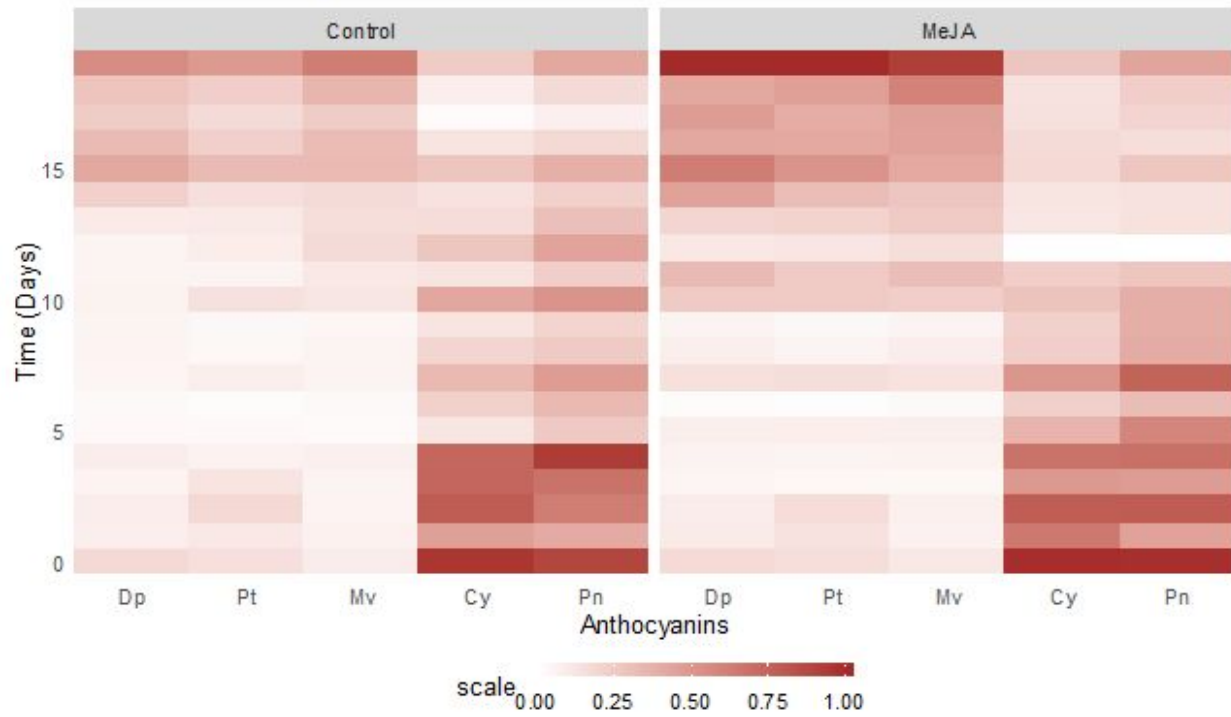

Figure S3. Anthocyanin composition in percentage of total anthocyanins of *Vitis vinifera* (L.) cv Gamay cell suspensions applied with MeJA

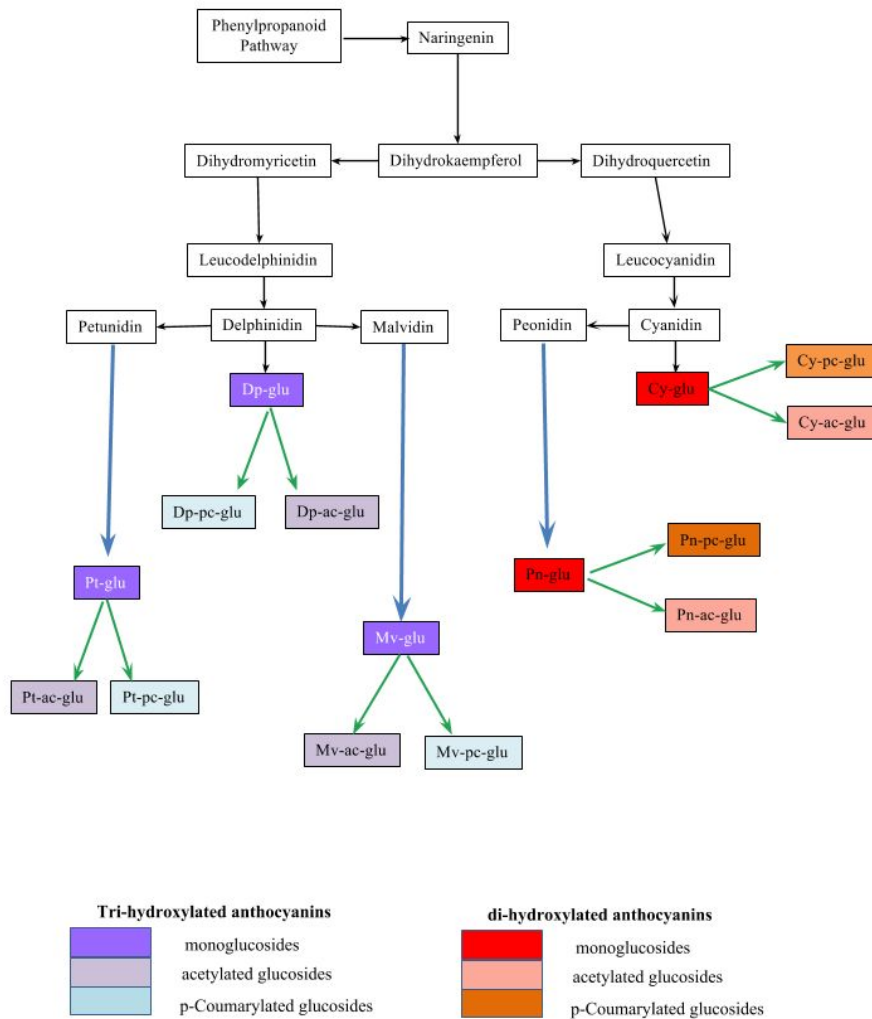

*Figure S4 Scheme of the biosynthesis pathway of anthocyanins in grape cell cultures:*  
*Dp-glu: Delphinidin-3-O-glucoside; Dp-ac-glu: Delphinidin-acetyl-3-O-glucoside; Dp-pc-glu: Delphinidin-3-O-(6-p-coumaroyl)glucoside; Cy-glu: Cyanidin-3-O-glucoside;*  
*Cy-ac-glu: Cyanidin-acetyl-3-O-glucoside; Cy-pc-glu: Cyanidin 3-O-(6-p-coumaroyl)glucoside;*  
*Pt-glu: Petunidin-3-O-glucoside; Pt-ac-glu: Petunidin-acetyl-3-O-glucoside; Pt-pc-glu: Petunidin 3-O-(6-p-coumaroyl)glucoside;*  
*Mv-glu: Malvidin-3-O-glucoside; Mv-ac-glu: Malvidin-acetyl-3-O-glucoside; Mv-pc-glu: Malvidin 3-O-(6-p-coumaroyl)glucoside;*  
*Pn-glu: Peonidin-3-O-glucoside; Pn-ac-glu: Peonidin-acetyl-3-O-glucoside; Pn-pc-glu: Peonidin 3-O-(6-p-coumaroyl)glucoside.*

# Diagnosis of GAM models

## Total anthocyanin concentration

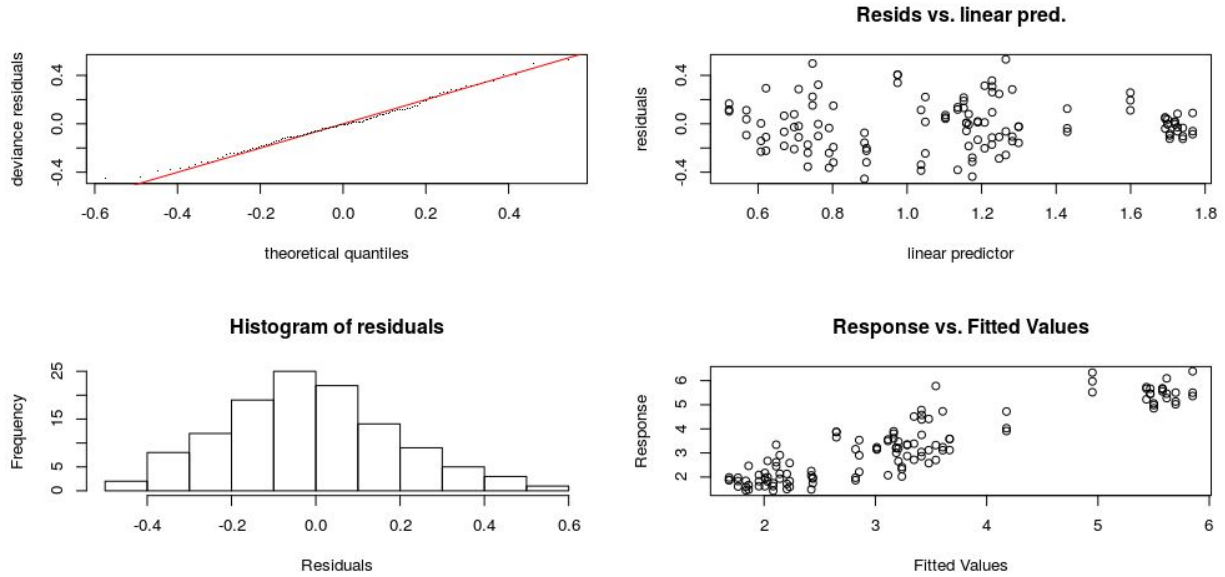

## Delphinidin-3-O-glucoside

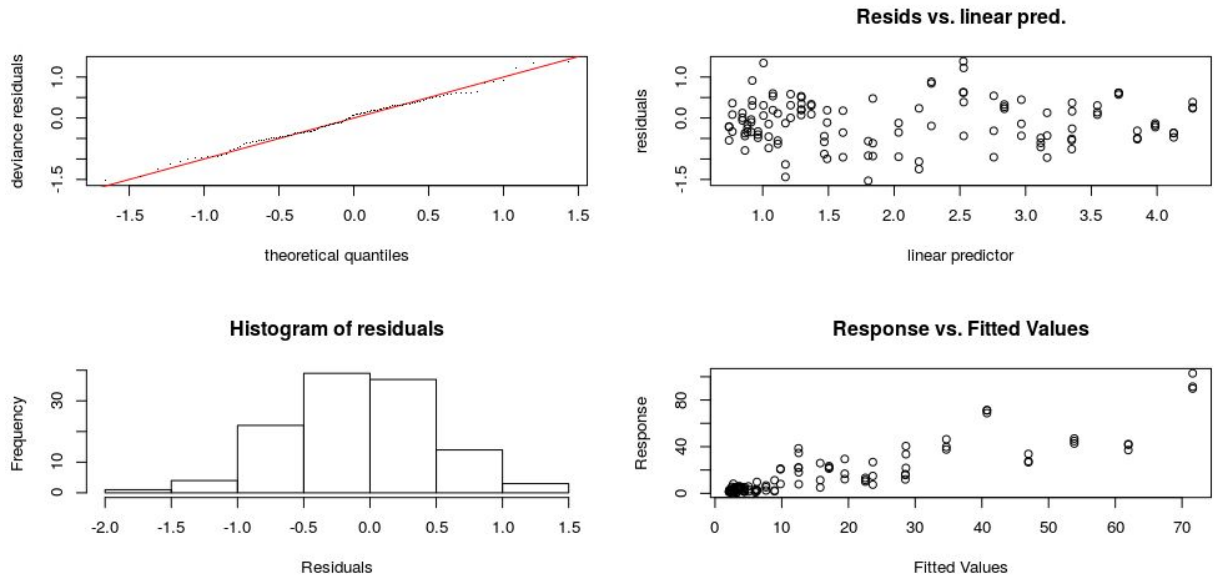

## Cyanidin-3-O-glucoside

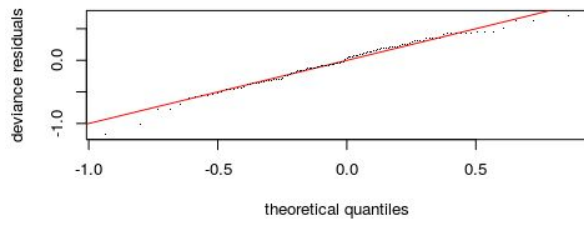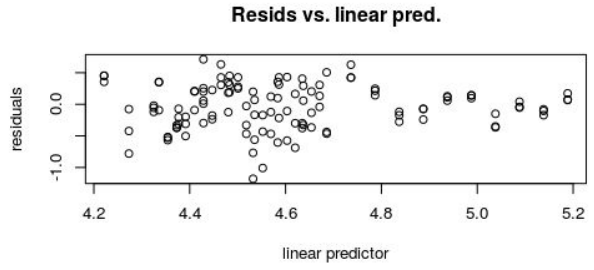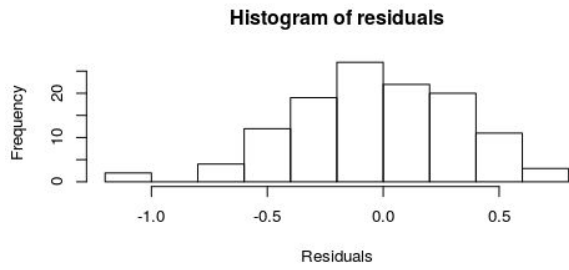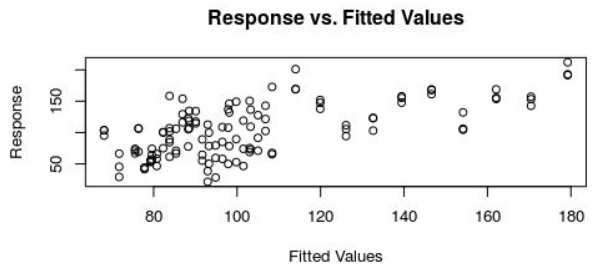

## Delphinidin-Ac-3-O-glucoside

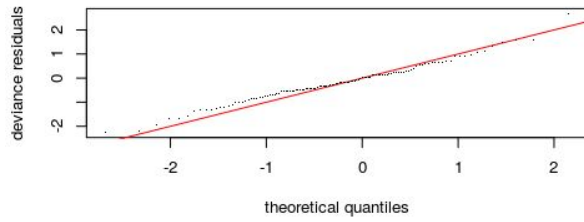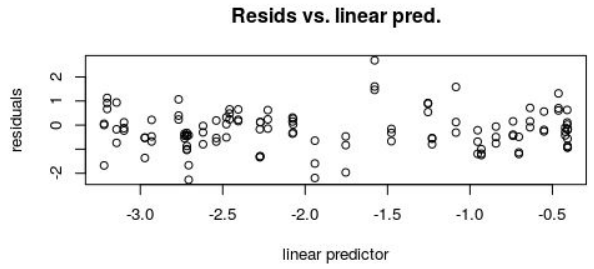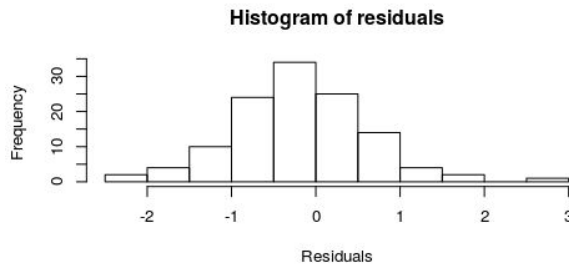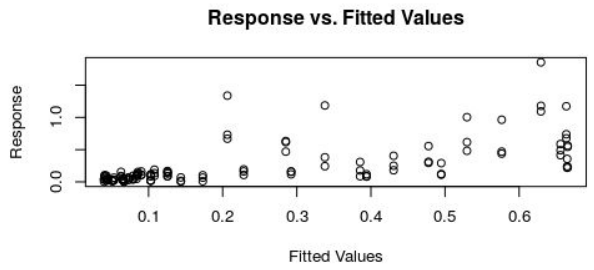

## Delphinidin-pc-3-O-glucoside

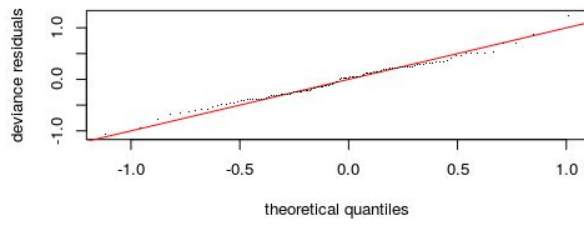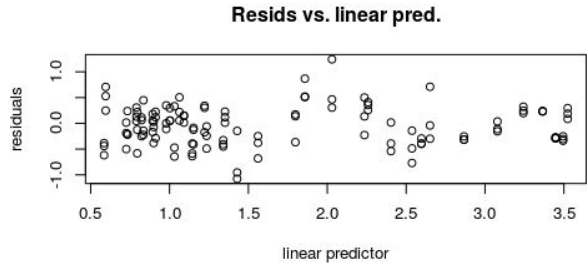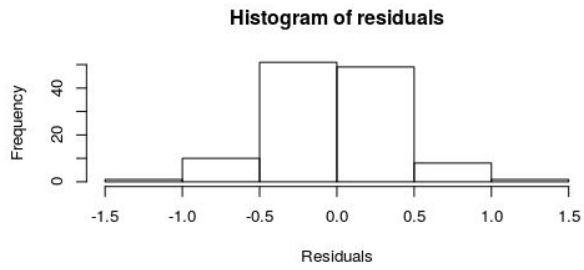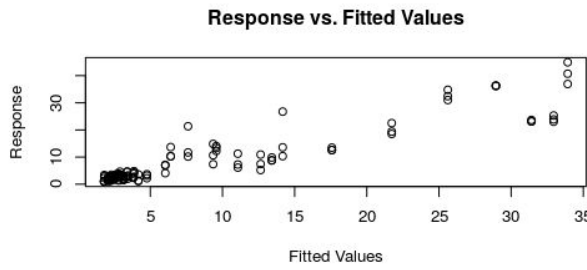

## Cyanidin-Ac-3-O-glucoside

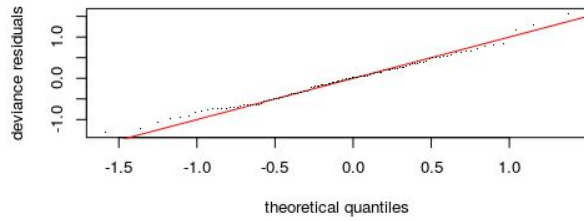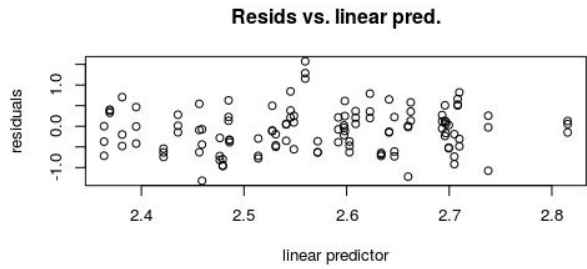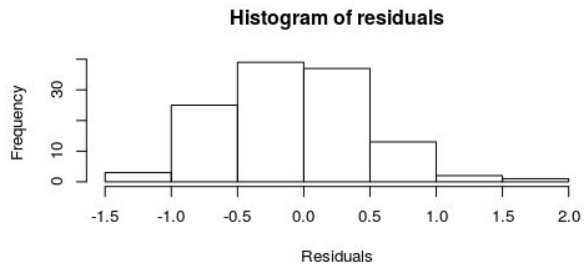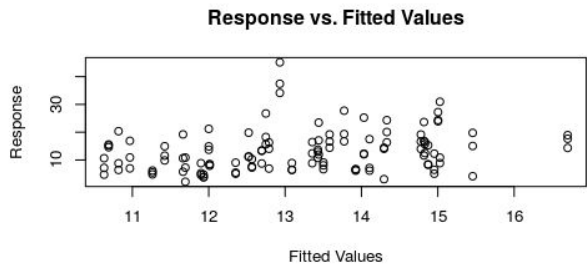



## Cyanidin-pc-3-O-glucoside

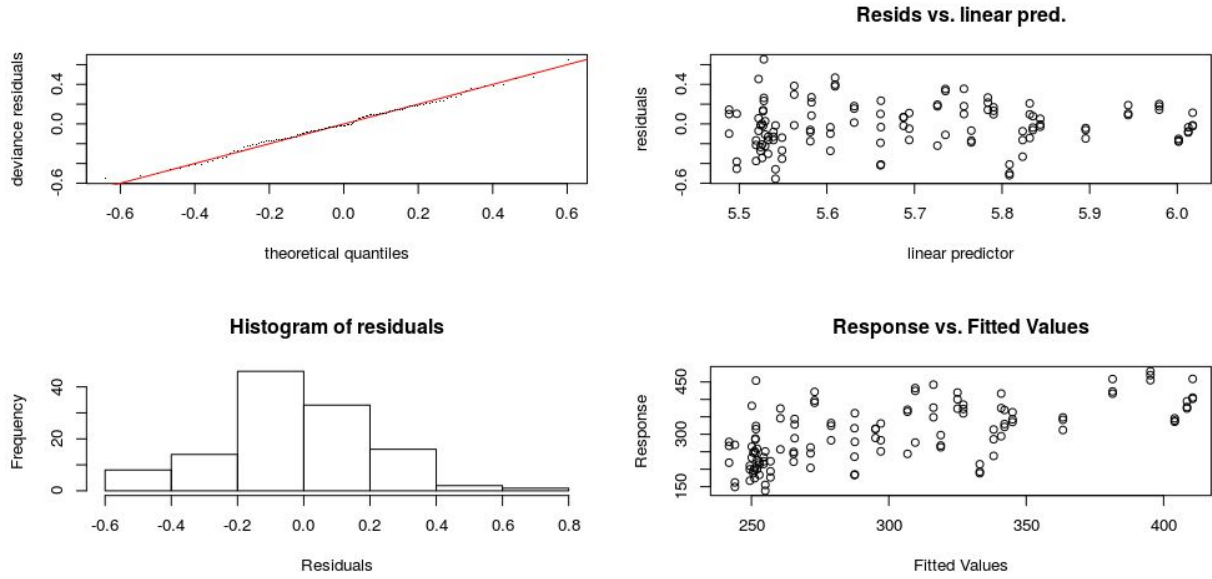

## Cyanidin-pc-3-O-glucoside/Cyanidin-3-O-glucoside

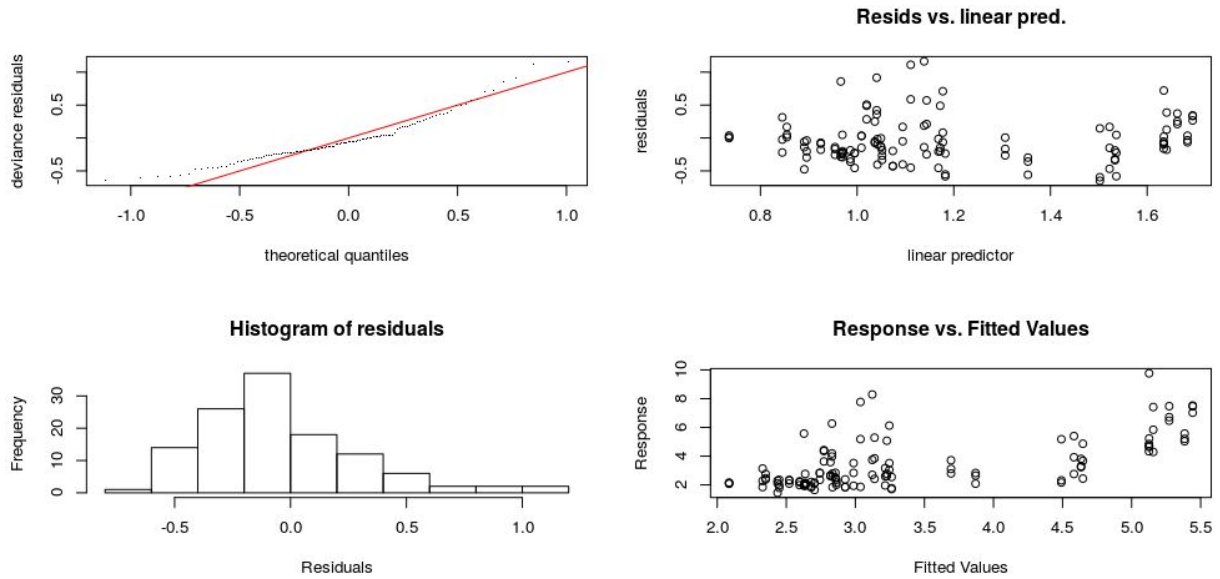

# Delphinidin-pc-3-O-glucoside/Delphinidin-3-O-glucoside

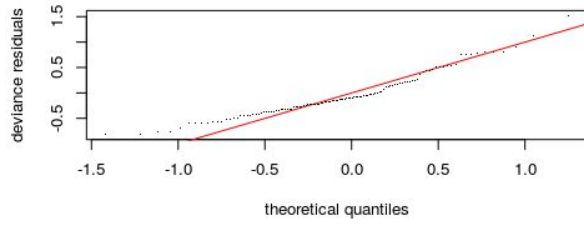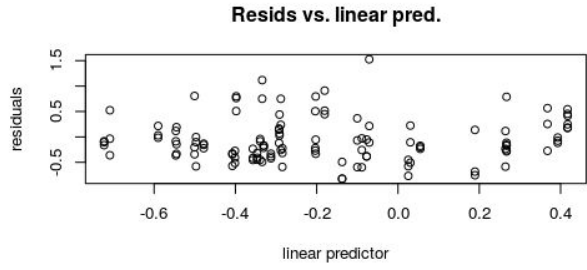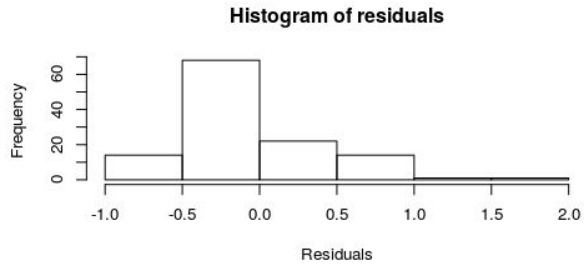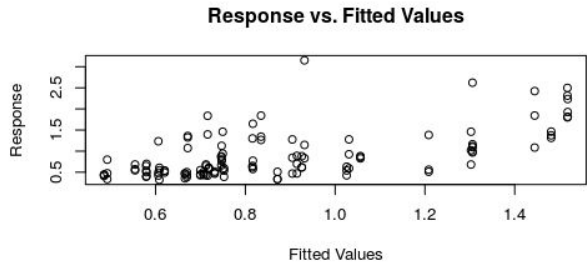

Supplement: hortres201738-s1.pdf [file hortres201738-s1.pdf]
